# Supplementary material for: The Forteo Patient Registry linkage to multiple state cancer registries: study design and results from the first 8 years
Source: Springer Nature journal article supplement (doi:10.1007/s00198-018-4604-8), 2018-07-05
Supplement: MOESM2 [file 15910962]

**Figure S-2. Variables Included in the Standard Algorithm**

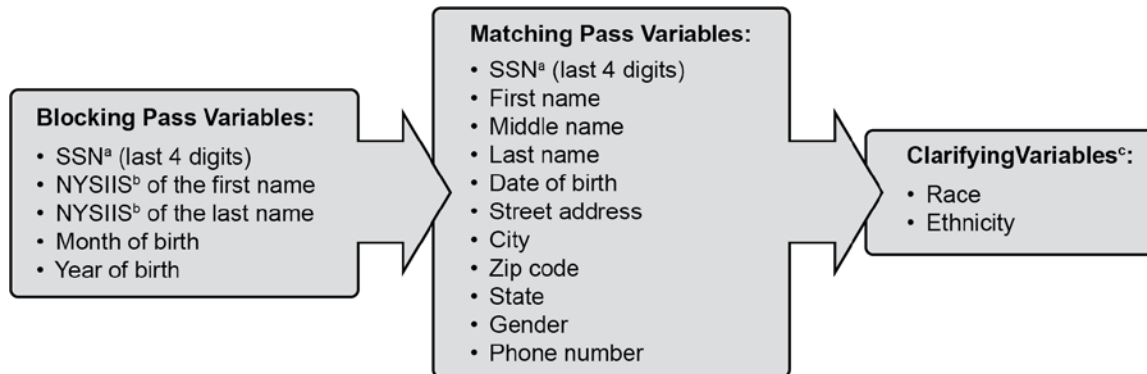

<sup>a</sup> Social Security number.

<sup>b</sup> New York State Identification and Intelligence System (a phonetic algorithm).

<sup>c</sup> Variables used to help resolve possible matches but not used to block or match.
