# Supplementary material for: The Forteo Patient Registry linkage to multiple state cancer registries: study design and results from the first 8 years
Source: Springer Nature journal article supplement (doi:10.1007/s00198-018-4604-8), 2018-07-05
Supplement: MOESM3 [file 15910962]

**Table S-1. US State Cancer Registries' Participation in Each Annual Linkage**

| <b>Year(s) of Linkage</b> | <b>Number of Registries Participating</b> | <b>Projected Percentage of Coverage of Osteosarcoma Patients Aged <math>\geq</math> 18 Years</b> |
|---------------------------|-------------------------------------------|--------------------------------------------------------------------------------------------------|
| 2010                      | 27                                        | 70%                                                                                              |
| 2011                      | 37                                        | 85%                                                                                              |
| 2012                      | 38                                        | 86%                                                                                              |
| 2013-2015 <sup>a</sup>    | 41                                        | 92%                                                                                              |
| 2016-2017 <sup>b</sup>    | 42                                        | 93%                                                                                              |

<sup>a</sup> 41 registries participated in the fourth through sixth annual linkages (2013-2015).

<sup>b</sup> 42 registries participated in the seventh and eighth annual linkages (2016 and 2017).
