# Supplementary figures and images for: The Forteo Patient Registry linkage to multiple state cancer registries: study design and results from the first 8 years
Source: Springer Nature journal article supplement (doi:10.1007/s00198-018-4604-8), 2018-07-05

**Figure S-1. Enrollment Flow Diagram**

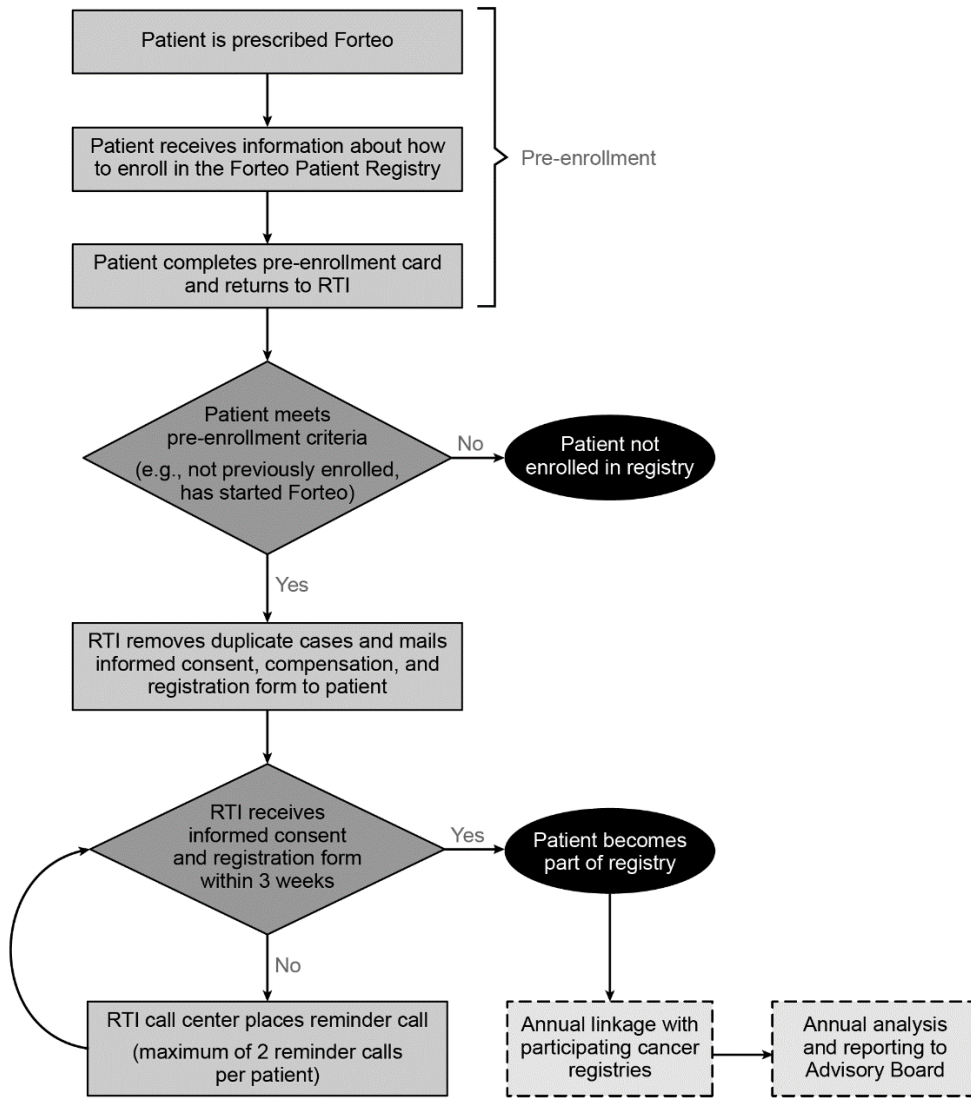

Supplement: MOESM1 [file 15910962]
